# Supplementary material for: Interstitial Fluid Flows along Perivascular and Adventitial Clearances around Neurovascular Bundles
Source: J Funct Biomater. 2022 Oct 1;13(4):172. doi: 10.3390/jfb13040172 (PMC9624367; doi:10.3390/jfb13040172)
Supplement: Supplementary file 1 [file jfb-13-00172-s001.zip]

Archive with 6 entries (6 files):
- Supplementary Experiments.pdf
- Video S1.mp4
- Video S2.mp4
- Video S3.mp4
- Video S4.mp4
- Video S5.mp4
